# Supplementary material
Source: PubMed Central journal article supplement (PMC6150818)
Supplement: NIHMS959888-supplement-2.pdf [file NIHMS959888-supplement-2.pdf]

## Supplementary Figure 1

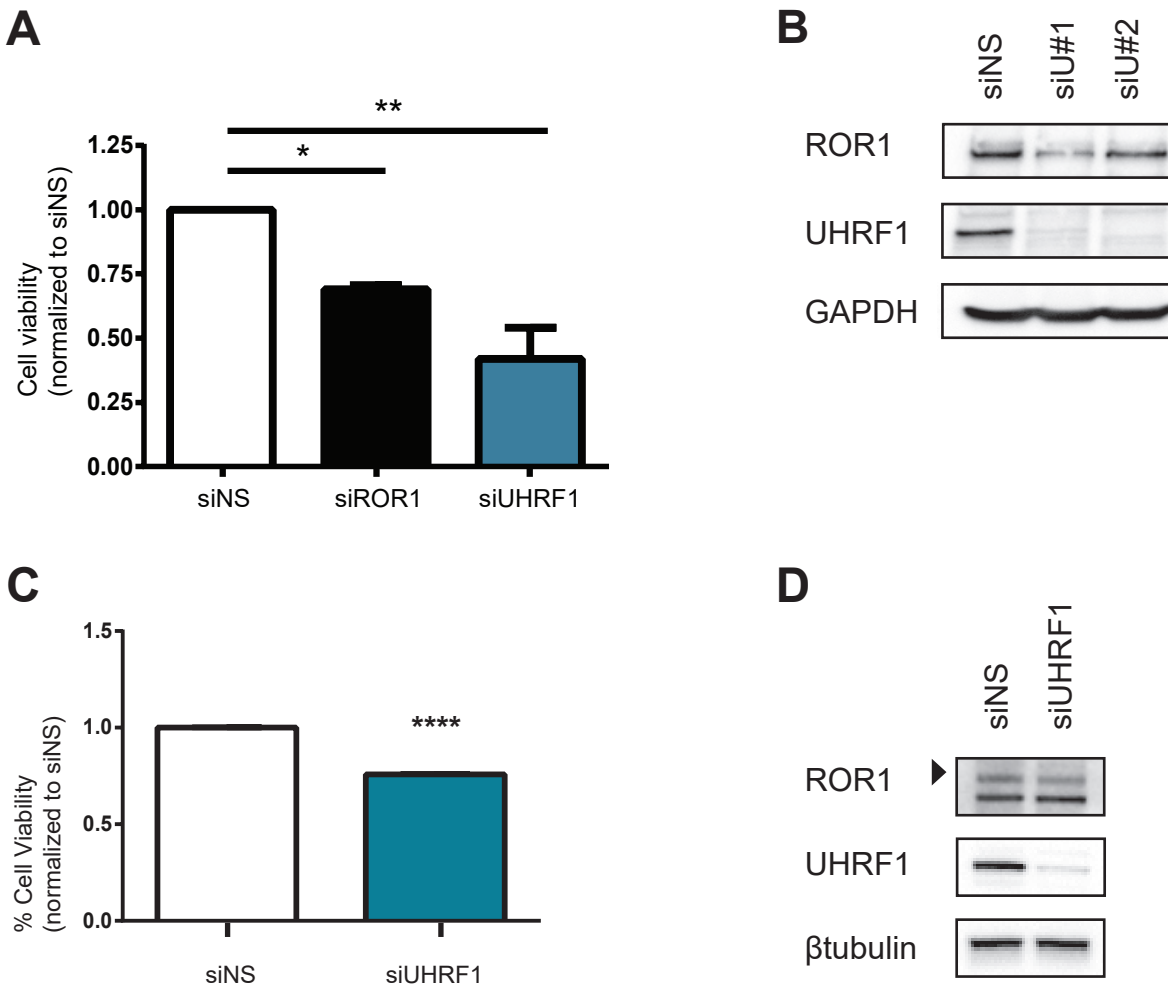

### Supplementary Figure 1. UHRF1 is required for t(1;19) pre-B-ALL cell viability and ROR1 protein levels.

(A) RCH-ACV cells were electroporated with siRNA against ROR1 or UHRF1. Cell viability was measured by MTS assay (N=3 \*\* $p < 0.005$ , \* $p < 0.05$ ). Data was normalized to a non-specific siRNA control (siNS). (B) RCH-ACV cells were treated with individual siRNA duplexes #1 and #2 (see Materials and Methods) targeting UHRF1 expression. 72 hours post-electroporation, whole cell lysates were tested by immunoblot. Kasumi-2 cells were treated with siRNA by electroporation. (C) 96 hours later, cell viability was measured by MTS assay. (\*\*\*\* $p < 0.0001$ ). (D) 72 hours post-electroporation, whole cell lysates were tested by immunoblot. N=3. Error bars represent S.E.M.
