# Supplementary material
Source: PubMed Central journal article supplement (PMC6150818)
Supplement: NIHMS959888-supplement-3.pdf [file NIHMS959888-supplement-3.pdf]

## Supplementary Figure 2

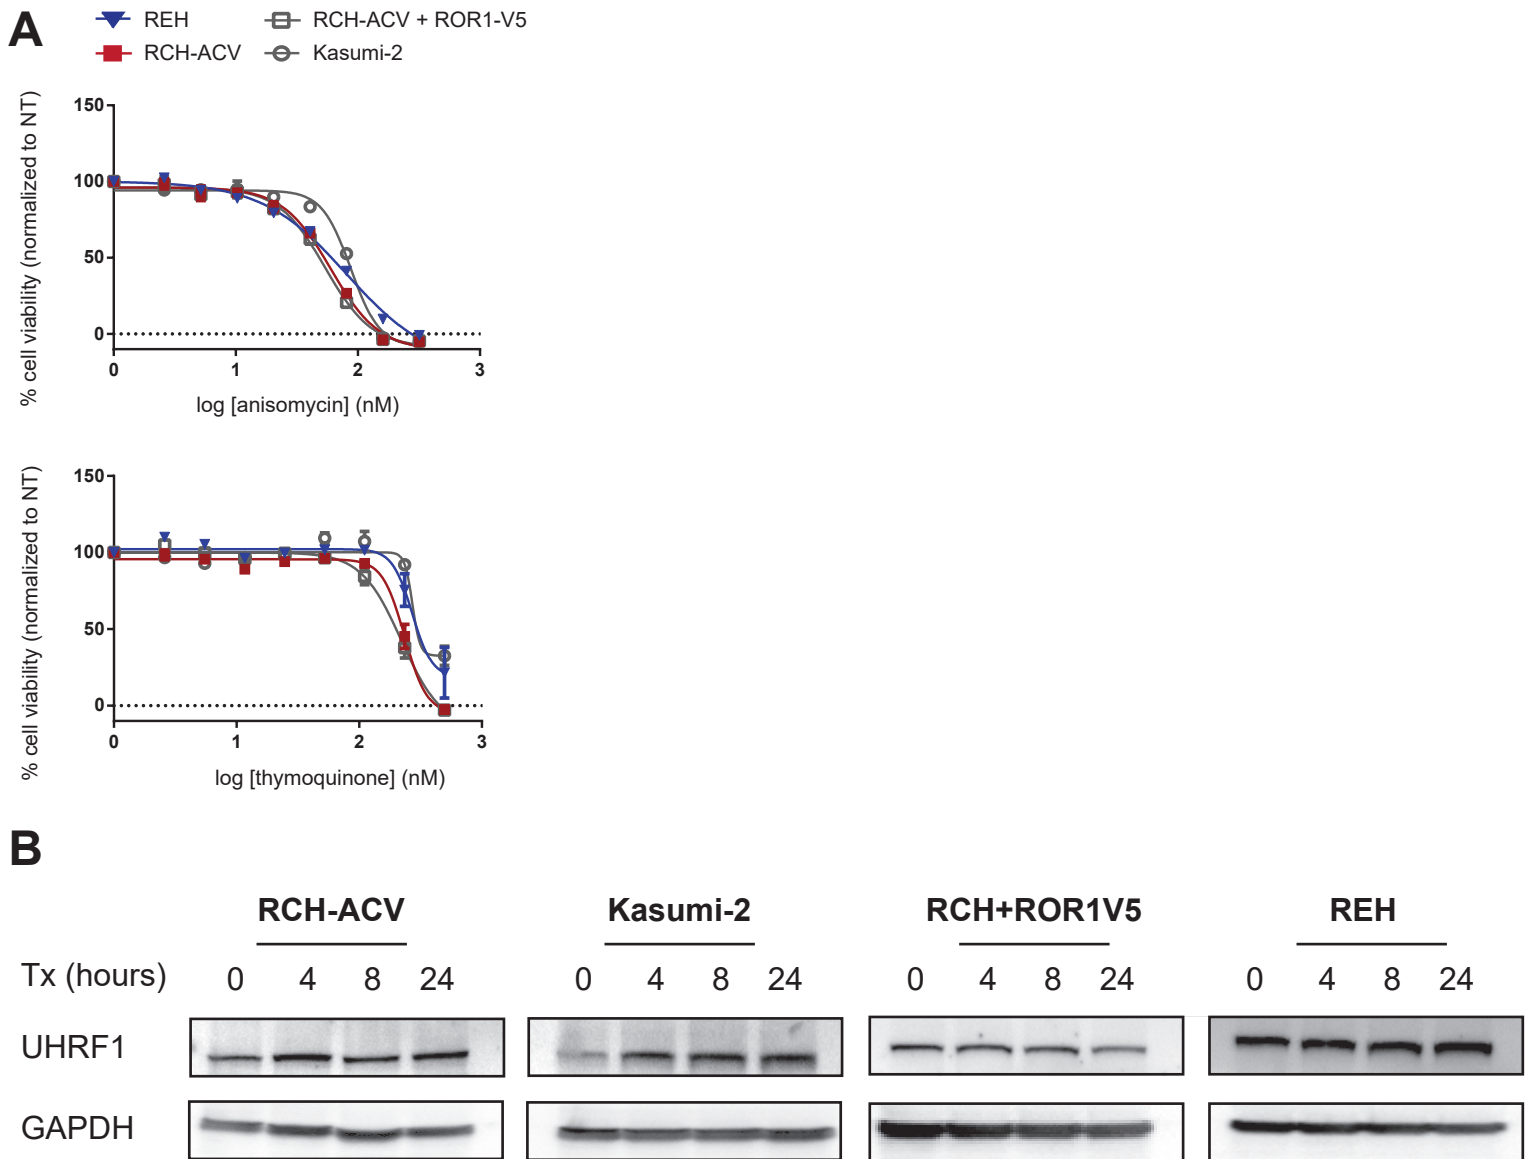

**Supplementary Figure 2. Effects of additional candidate UHRF1 inhibitors on cell viability. (A)** Cell lines were treated with anisomycin or thymoquinone (0-0.5  $\mu$ M) for 72 hours and cell viability was measured by MTS assay. Data shown is an average of three independent experiments. NT = non-treated. Error bars = S.E.M. **(B)** Cell lines were treated with anisomycin (60 nM) and tested for UHRF1 protein levels over 24 hours.
