# Supplementary material
Source: PubMed Central journal article supplement (PMC6150818)
Supplement: NIHMS959888-supplement-4.pdf [file NIHMS959888-supplement-4.pdf]

### Supplementary Figure 3

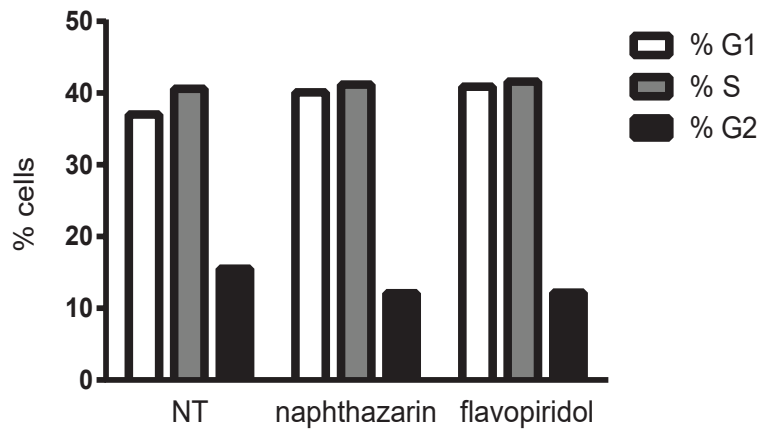

**Supplementary Figure 3. Naphthazarin induces cell cycle arrest in t(1;19) pre-B-ALL.** RCH-ACV cells were treated with 50nM naphthazarin for 8 hours and subsequently stained with propidium iodide to detect cells in G1, S, and G2 phases. Non-treated (NT) and cells treated with flavopiridol were used as controls.
