# Supplementary material
Source: PubMed Central journal article supplement (PMC6150818)
Supplement: NIHMS959888-supplement-5.pdf [file NIHMS959888-supplement-5.pdf]

## Supplementary Figure 4

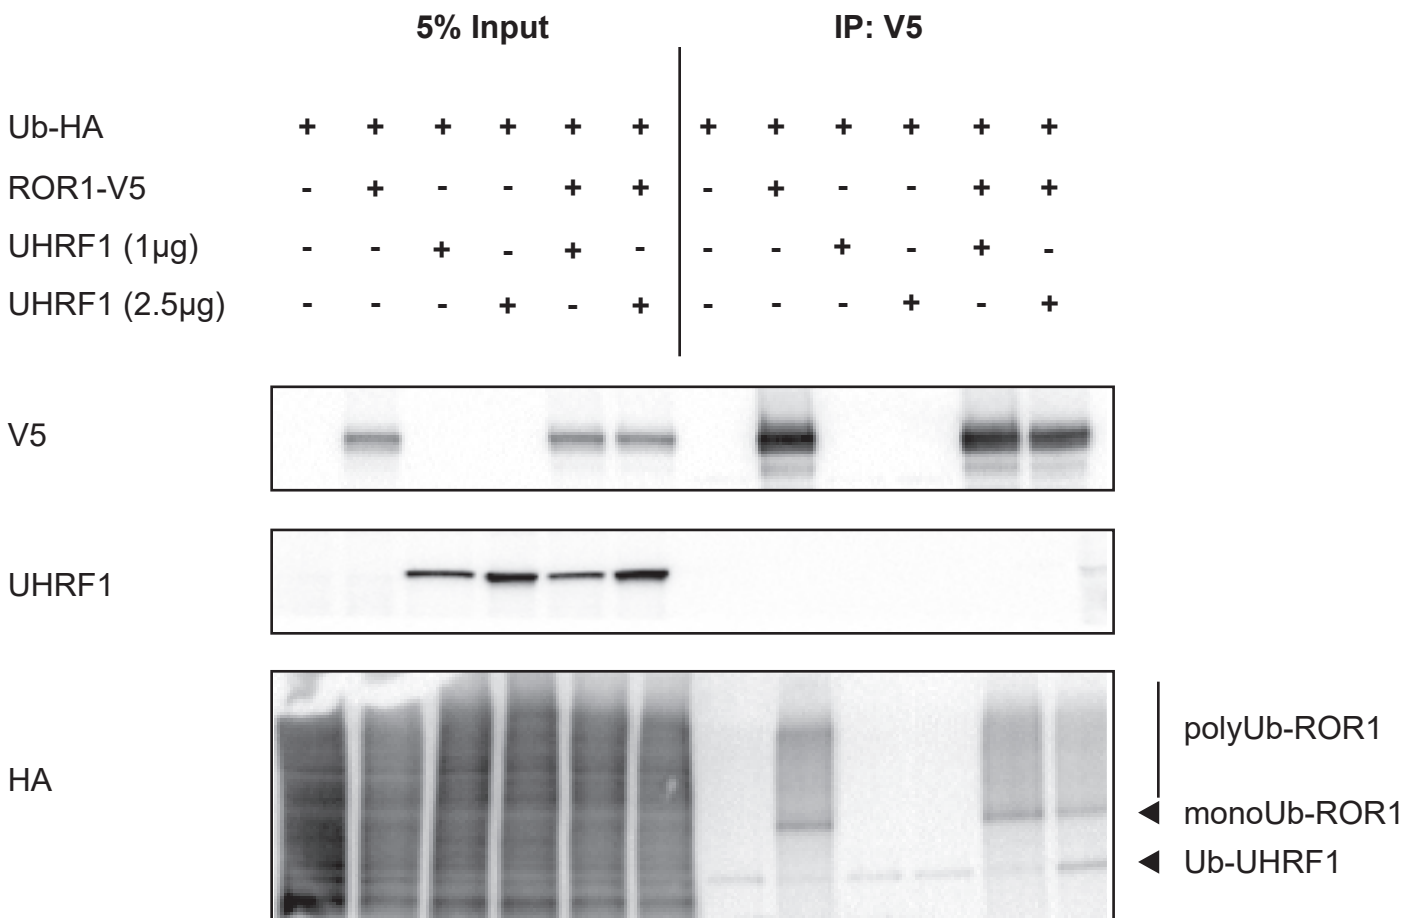

**Supplementary Figure 4. UHRF1 is associated with mono- and poly-ubiquitinated ROR1.** HEK293 cells were transfected with HA-tagged ubiquitin, V5-tagged ROR1, or wild-type UHRF1 (1  $\mu$ g or 2.5  $\mu$ g). 48 hours post-transfection, lysates were harvested and enriched with a V5 antibody. Immunoprecipitates were evaluated for ubiquitinated-ROR1 by immunoblot. Note that ROR1 is poly- and mono-ubiquitinated.
